# Supplementary material for: Synthesis and biological properties of tetranuclear ruthenium complexes containing the bis[4(4′-methyl-2,2′-bipyridyl)]-1,7-heptane ligand
Source: Royal Society of Chemistry journal article supplement (doi:10.1039/c9dt03221e), 2019-01-01
Supplement: c9dt03221e1.pdf [file c9dt03221e1.pdf]

## SUPPLEMENTARY INFORMATION

Synthesis and biological properties of tetranuclear ruthenium complexes  
containing the bis[4(4'-methyl-2,2'-bipyridyl)]-1,7-heptane ligand

Biyun Sun, Madhu K. Sundaraneedi, Hannah M. Southam, Robert K. Poole, Ian F.  
Musgrave, F. Richard Keene and J. Grant Collins

---

### Contents

**Figure S1** –  $^1\text{H}$  NMR spectrum of the aromatic protons of  $\text{Rubb}_7\text{-TNL}$

**Figure S2** –  $^1\text{H}$  NMR spectrum of the aromatic protons of  $\text{Rubb}_7\text{-TL}$

**Figure S3** – Changes in the fluorescence of HSA upon  $\text{Rubb}_7\text{-TNL}$  binding.

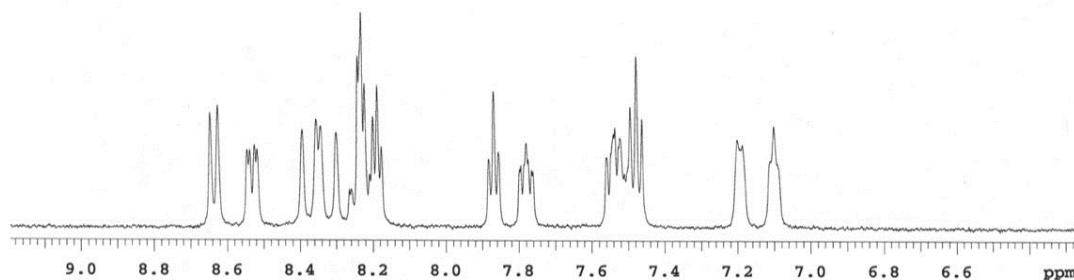

**Figure S1**  $^1\text{H}$  NMR spectrum of the aromatic protons of  $\text{Rubb}_7\text{-TNL}$

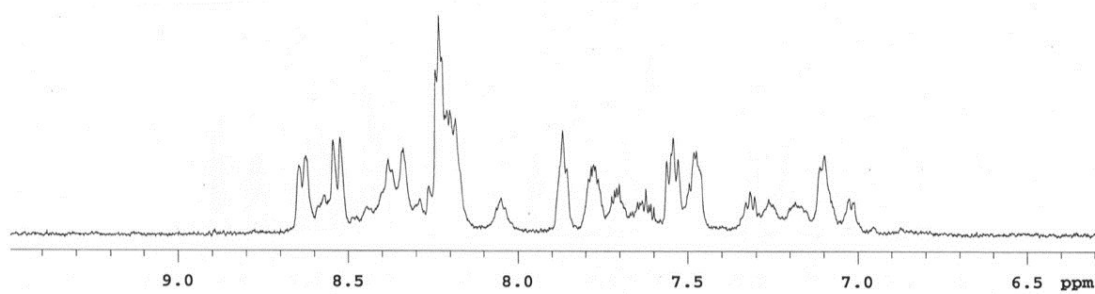

**Figure S2**  $^1\text{H}$  NMR spectrum of the aromatic protons of Rubb<sub>7</sub>-TL

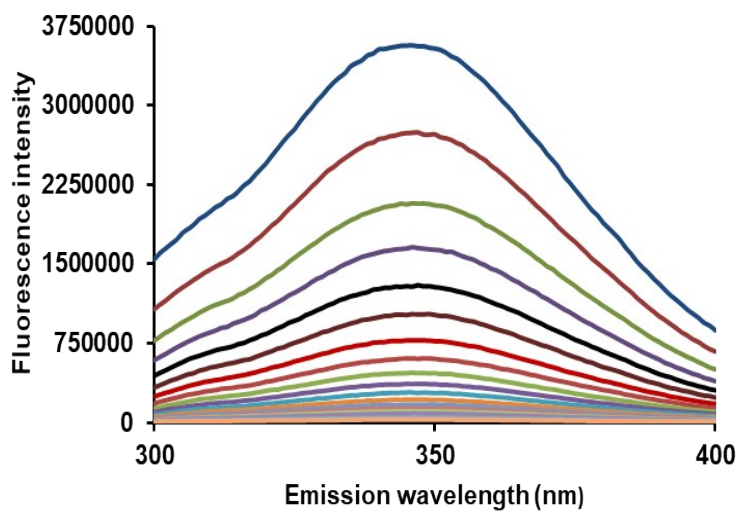

**Figure S3** Changes in the fluorescence of HSA upon Rubb<sub>7</sub>-TNL binding.
